# Supplementary material
Source: PubMed Central journal article supplement (PMC4816712)

Rhesus Macaque

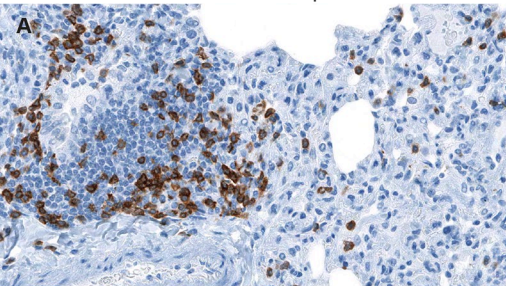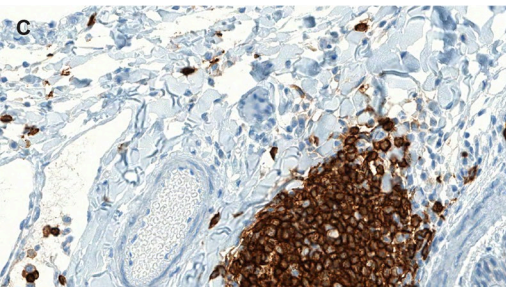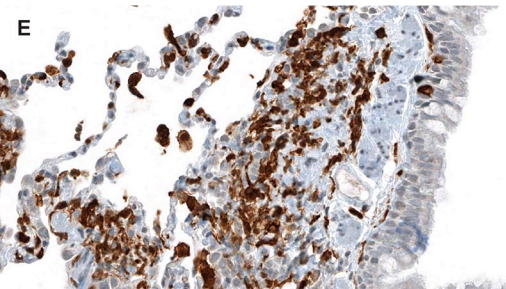

Common Marmoset

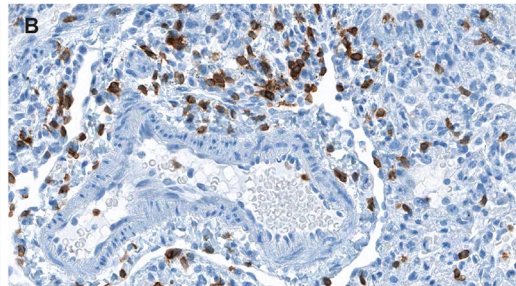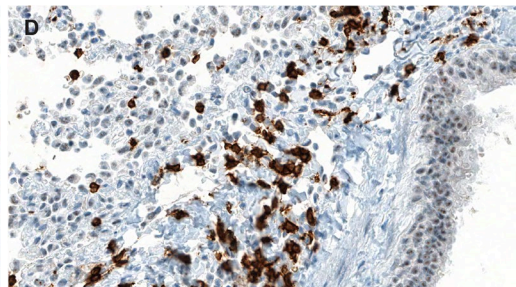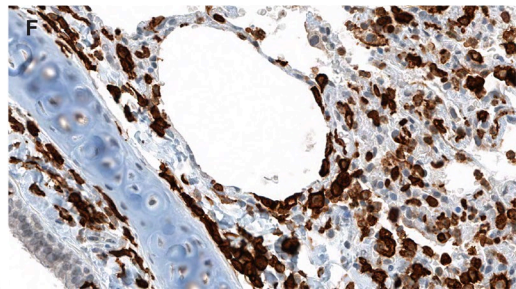

Supplement: mmc1.pdf [file mmc1.pdf]
